# Supplementary material for: Novel Peptide-Calix[4]arene Conjugate Inhibits Aβ Aggregation and Rescues Neurons from Aβ’s Oligomers Cytotoxicity In Vitro
Source: PubMed Central journal article supplement (PMC9535895; doi:10.1021/acschemneuro.1c00117), 2021-04-12
Supplement: cn1c00117_si_001.pdf [file cn1c00117_si_001.pdf]

## Supporting Information

### Novel Peptide-Calix[4]arene Conjugate Inhibits A $\beta$ Aggregation and Rescues Neurons from A $\beta$ 's Oligomers Cytotoxicity *in vitro*

Grazia Maria Letizia Consoli,\* Rita Tosto, Ausilia Baglieri, Salvatore Petralia, Tiziana Campagna, Giuseppe Di Natale, Stefania Zimbone, Maria Laura Giuffrida, Giuseppe Pappalardo.\*

**Grazia Maria Letizia Consoli; Ausilia Baglieri** - CNR-Institute of Biomolecular Chemistry, Via P. Gaifami 18, 95126 Catania, Italy.

**Rita Tosto** - International PhD School of Chemical Sciences, University of Catania, V.le A. Doria 6, 95125 Catania, Italy; CNR-Institute of Crystallography, Via P. Gaifami 18, 95126 Catania, Italy.

**Salvatore Petralia** - Department of Drug Sciences and Health, University of Catania, V.le A. Doria 6, 95125 Catania, Italy.

**Giuseppe Pappalardo; Tiziana Campagna; Giuseppe Di Natale; Maria Laura Giuffrida; Stefania Zimbone.**- CNR-Institute of Crystallography, Via P. Gaifami 18, 95126 Catania, Italy.

#### TABLE OF CONTENTS

**Table S1.** Deconvoluted values of random coil secondary structure reported as the mean value obtained with CONTIN and CDSSTR algorithms standard error (RMSD) in parenthesis.

**Table S2.** ThT kinetic parameters related to the aggregation of A $\beta$ <sub>42</sub> alone or in the presence of the compounds **1** or **5** or GPGKLVFF, with A $\beta$ /compound ratio 1:1 or 1:5.

**Scheme S1.** A $\beta$ <sub>42</sub> proteolytic pattern after 2 h of trypsin digestion at an enzyme/substrate ratio of 1:20 w/w.

**Scheme S2.** A $\beta$ <sub>42</sub> proteolytic pattern after 2 h of trypsin digestion of A $\beta$ <sub>42</sub>/**5** sample at an enzyme/substrate ratio of 1: 20 w/w.

**Figure S1.** ESI-MS spectrum of GPGK(Dde)LVFF.

**Figure S2.** FT-MS Spectrum of conjugate **5**.

**Figure S3.** HCD spectra and fragmentation pattern of conjugate **5**.

**Figure S4.** MALDI-TOF spectrum of conjugate **5**.

**Figure S5.** <sup>1</sup>H NMR spectrum of conjugate **5**.

**Figure S6.** 2D-COSY NMR spectrum of conjugate **5**.

**Figure S7.** <sup>13</sup>C NMR spectrum of conjugate **5**.

**Figure S8.**  $^{13}\text{C}$  DEPT NMR spectrum of conjugate **5**.

**Figure S9.** 2D-HSQC-NMR spectrum of conjugate **5**.

**Figure S10.** 2D-HMBC-NMR spectrum of conjugate **5**.

**Figure S11.** CD spectra of conjugate **5** at 5  $\mu\text{M}$  and 25  $\mu\text{M}$ .

**Figure S12.** CD spectra of  $\text{A}\beta_{42}$  in the presence of compound **1** (ratio 1:1 and 1:5) and compound **1** alone.

**Figure S13.** CD spectra of  $\text{A}\beta_{42}/\text{GPGKLVFF}$  (ratio 1:1 and 1:5) and GPGKLVFF alone.

**Figure S14.** ThT fluorescence kinetic of **5** and **1** and GPGKLVFF.

**Figure S15.** DLS size distributions by number % for conjugate **5** at  $t=0$  and after 120 h incubation.

**Figure S16.** DLS size distribution and zeta potential ( $\xi$ ) of **5** at 20  $\mu\text{M}$ .

**Figure S17.** ESI-MS spectrum of  $\text{A}\beta_{42}/\text{5}$  sample.

**Figure S18.** ESI-MS spectrum of  $\text{A}\beta_{42}/\text{GPGKLVFF}$  sample.

**Figure S19.** Isotopic patterns of peptide fragment produced after 2 h of  $\text{A}\beta_{42}$  digestion with trypsin.

**Figure S20.** Representative western blot showing two different concentrations of  $\text{A}\beta$  oligomers obtained after 48 h incubation at  $4^\circ\text{C}$  in the presence or absence of KLVFF peptide, GPGKLVFF and compound **5**.

**Table S1.** Values of random coil secondary structure determined as the average of CONTIN and CDSSTR methods with deconvolution algorithms and the relative standard error (RMSD).

| <b>Sample</b>                  | <b>CONTIN /CDSSTR</b> | <b>RMSD</b> |
|--------------------------------|-----------------------|-------------|
| A $\beta$ 0h                   | 0.549                 | 0.08        |
| A $\beta$ , 120 h              | 0.246                 | 0.100       |
| A $\beta$ :5 1:1, 0 h          | 0.638                 | 0.168       |
| A $\beta$ :5 1:1, 120 h        | 0.587                 | 0.139       |
| A $\beta$ :5 1:5, 0 h          | 0.446                 | 0.112       |
| A $\beta$ :5 1:5, 120 h        | 0.470                 | 0.172       |
| A $\beta$ :1 1:1, 0 h          | 0.399                 | 0.164       |
| A $\beta$ :1 1:1, 120 h        | 0.366                 | 0.216       |
| A $\beta$ :1 1:5, 0 h          | 0.361                 | 0.231       |
| A $\beta$ :1 1:5, 120 h        | 0.414                 | 0.089       |
| A $\beta$ :GPGKLVFF 1:1, 0 h   | 0.564                 | 0.121       |
| A $\beta$ :GPGKLVFF 1:1, 120 h | 0.293                 | 0.220       |
| A $\beta$ :GPGKLVFF 1:5, 0 h   | 0.508                 | 0.344       |
| A $\beta$ :PGKLVFF 1:5, 120 h  | 0.322                 | 0.156       |

**Table S2.** Kinetic parameters related to the aggregation of A $\beta$ <sub>42</sub> alone or in the presence of the compounds **1** or **5** or GPGKLVFF, with A $\beta$ /compound 1:1 or 1:5 molar ratio. \* Not fitted

|                  | A $\beta$ (20 $\mu$ M) | A $\beta$ /5 (1:1) | A $\beta$ /5 (1:5) | A $\beta$ /1 (1:1) | A $\beta$ /1 (1:5) | A $\beta$ /GPGKLVFF (1:1)* | A $\beta$ /GPGKLVFF (1:5) |
|------------------|------------------------|--------------------|--------------------|--------------------|--------------------|----------------------------|---------------------------|
| F <sub>max</sub> | 10.70 $\pm$ 0.04       | 3.45 $\pm$ 0.02    | 0.53 $\pm$ 0.13    | 9.25 $\pm$ 0.25    | 4.95 $\pm$ 0.03    | n.f.                       | 7.34 $\pm$ 0.04           |
| K                | 2.71 $\pm$ 0.15        | 3.95 $\pm$ 0.19    | 6.32 $\pm$ 4.73    | 15.69 $\pm$ 1.33   | 10.12 $\pm$ 0.38   | n.f.                       | 1.19 $\pm$ 0.19           |
| t <sub>1/2</sub> | 7.13 $\pm$ 0.18        | 21.19 $\pm$ 0.22   | 46.91 $\pm$ 5.83   | 27.06 $\pm$ 1.08   | 19.92 $\pm$ 0.51   | n.f.                       | 5.54 $\pm$ 0.23           |
| t <sub>lag</sub> | 1.7 $\pm$ 0.12         | 14.25 $\pm$ 0.16   | 34.27 $\pm$ 3.63   | -4.32 $\pm$ 1.58   | -0.30 $\pm$ 0.26   | n.f.                       | 3.16 $\pm$ 0.15           |



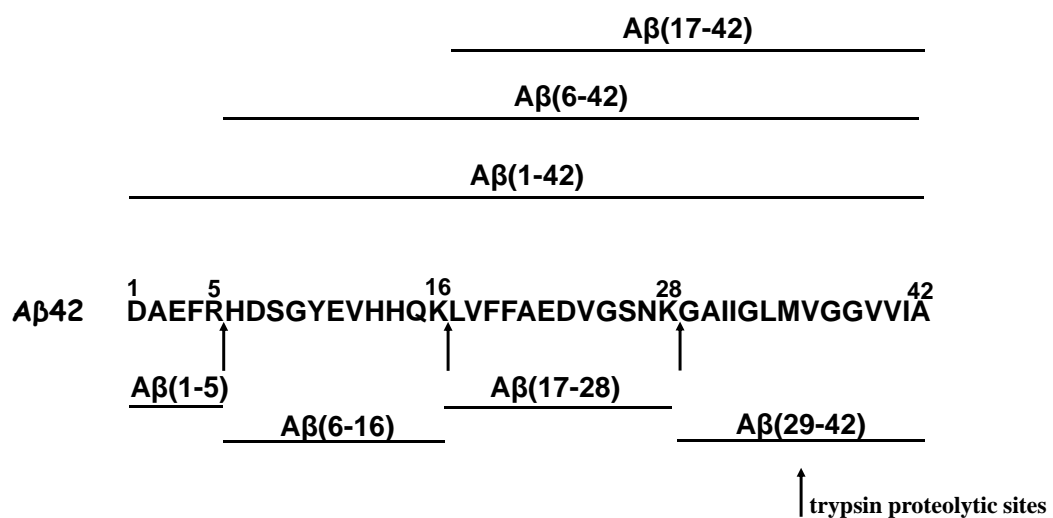

**Scheme S2.**  $A\beta_{42}$  proteolytic pattern after 2 h of trypsin digestion of  $A\beta_{42}/5$  sample at an enzyme/substrate ratio of 1: 20 w/w.

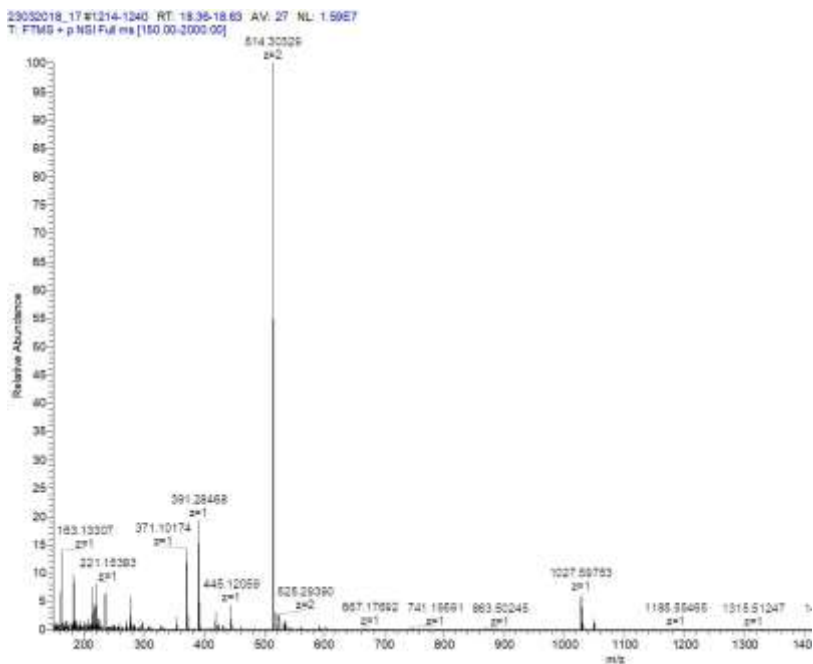

**Figure S1.** ESI-MS spectrum of GPGK(Dde)LVFF.

### Calix[4]arene-GPGKLVFF (**5**) characterization

Fourier Transform (FT-MS) and tandem mass spectrometry investigations provided additional information as a completion of **5** characterization. In particular, the accuracy of the  $m/z$  signal assigned to the synthesised product ( $< 3\text{ppm}$ ) and superimposition of the experimental and simulated isotopic distribution spectra, calculated by molecular formula, confirmed the identity of the synthesised product (**Figure S2**). Moreover, the fragmentation pattern observed in the MS/MS spectra of **5** (**Figure S3**), supported the correct amino acid sequence of the molecule. The principal fragments observed, when the  $m/z$  signal assigned to the **5** was selected as precursor ion, were generated by the cleavage of amide bonds in the peptide chain according to the mobile proton model theory. These fragments were labelled  $b_n$  and  $y_n$  depending on where the positive charge resides, at the N- or C-terminal side respectively. (B. Palzs, S. Suhal, *Mass Spectrom. Rev.* **2005**, *24*, 508–548) Tandem mass spectra also show internal fragments resulting from  $b_n$  and  $y_n$  fragments ions undergoing a second dissociation.

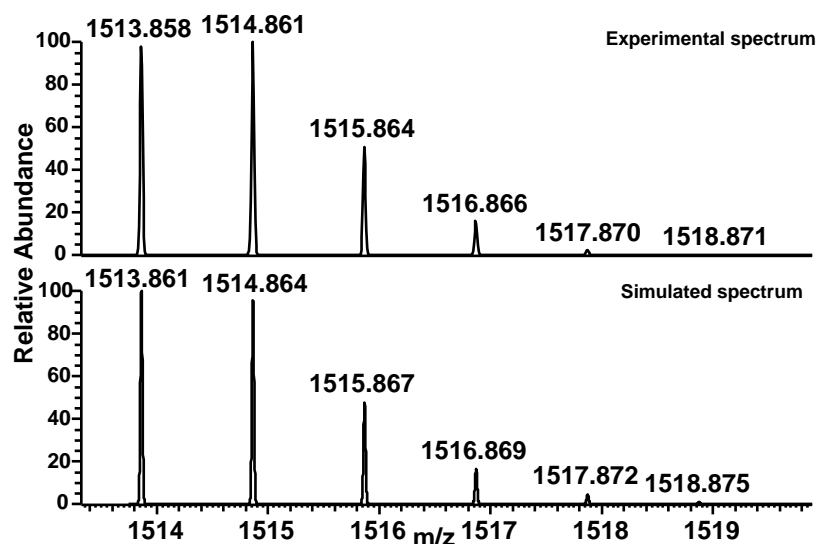

**Figure S2.** Measured isotopic profiles and theoretical isotopic patterns of **5**.

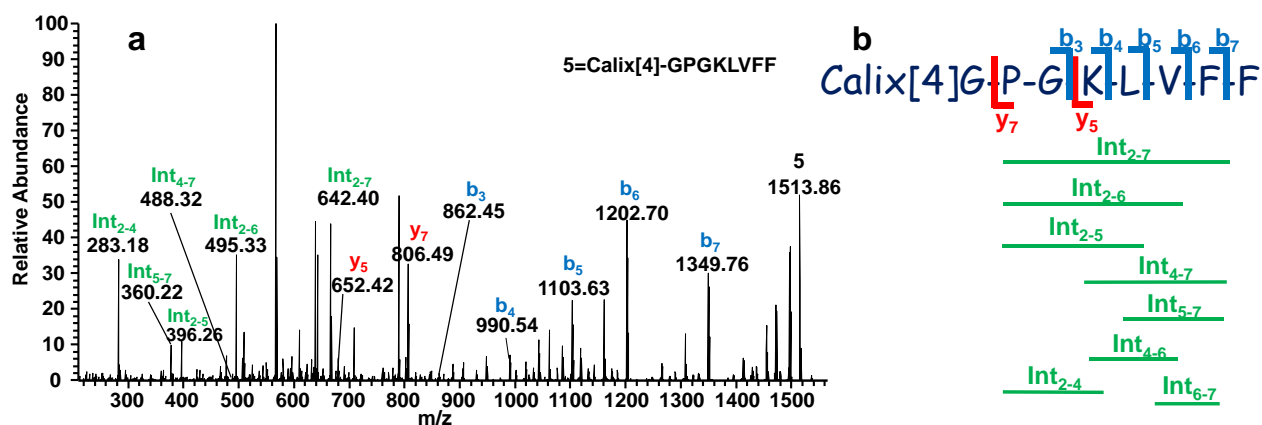

**Figure S3. a)** HCD spectra of single charged **5** ( $C_5 = 27.5 \times 10^{-6} M$ ) ( $m/z [5]^+ = 1513.86$ ). The  $b_n$  type fragment (blue colour),  $y_n$  type fragments (red colour) and internal type fragments (green colour) produced through the cleavage of a bond in the peptide chain were also reported; **b)** fragmentation pattern observed in the MS/MS mass spectrum reported in a).



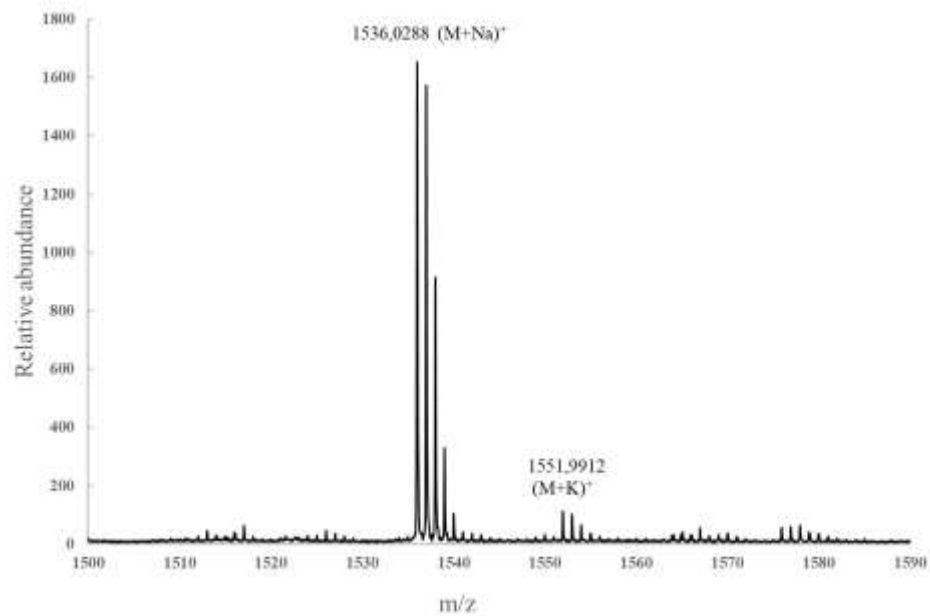

**Figure S4.** MALDI-TOF spectrum of conjugate **5**.

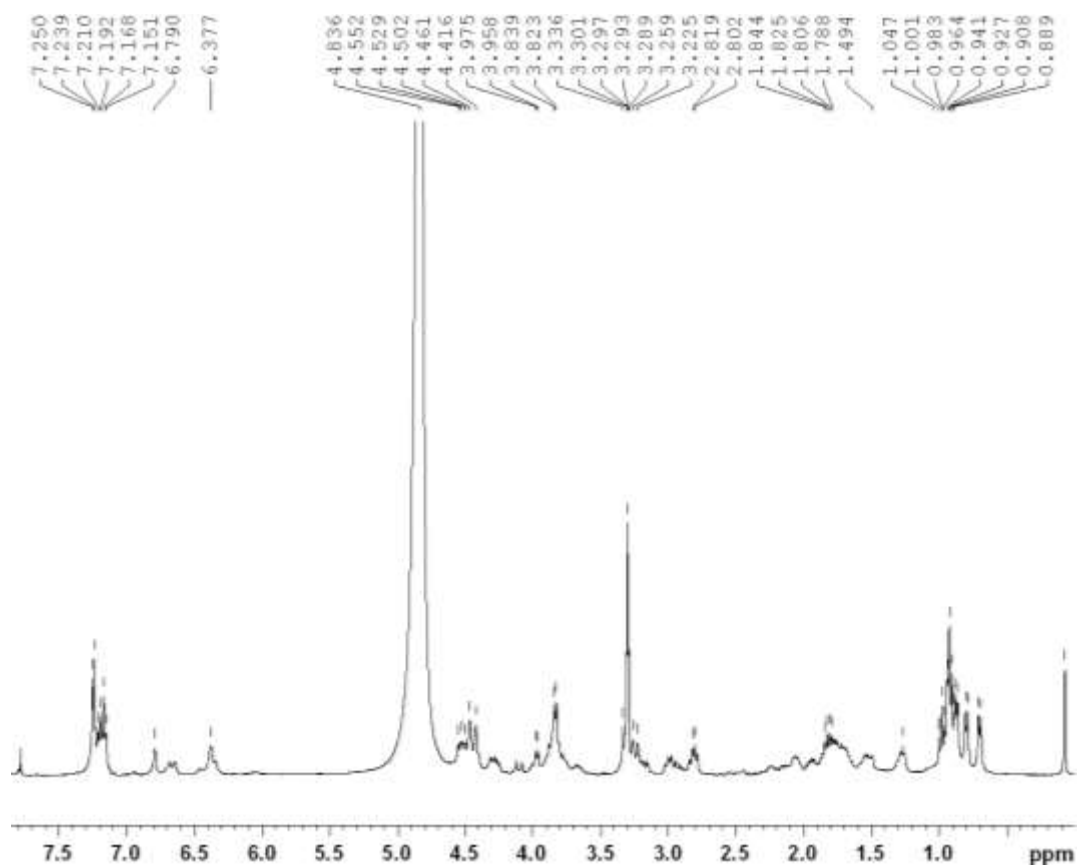

**Figure S5.** <sup>1</sup>H-NMR spectrum of the conjugate **5** (400.13 MHz, MeOD/CDCl<sub>3</sub> 3:1 v/v, 297 K).

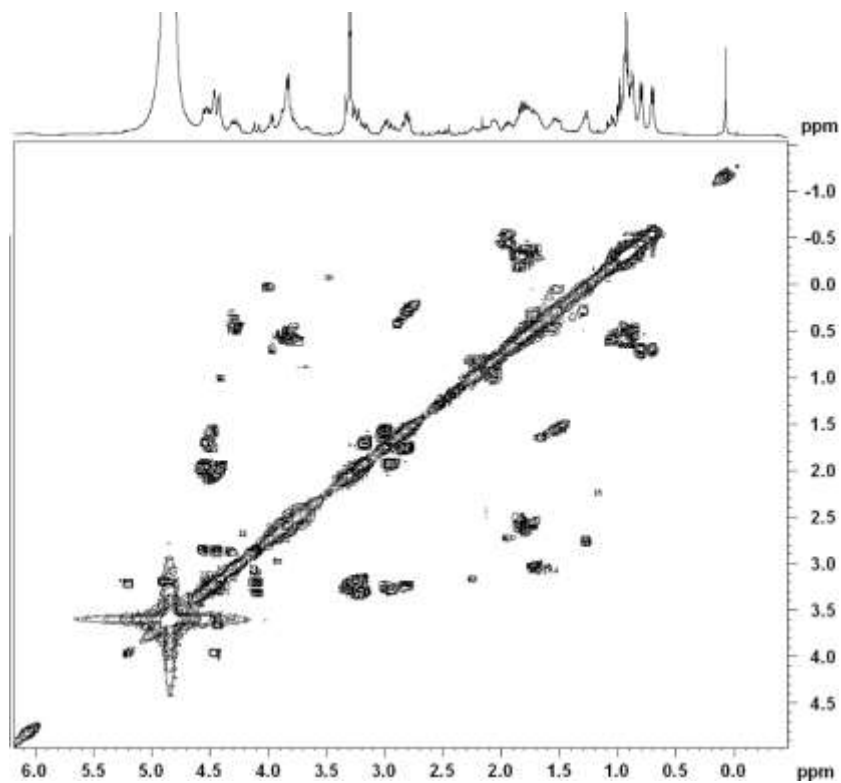

**Figure S6.** 2D-COSY NMR spectrum of conjugate **5** (400.13 MHz, MeOD/CDCl<sub>3</sub> 3:1 v/v, 297 K)

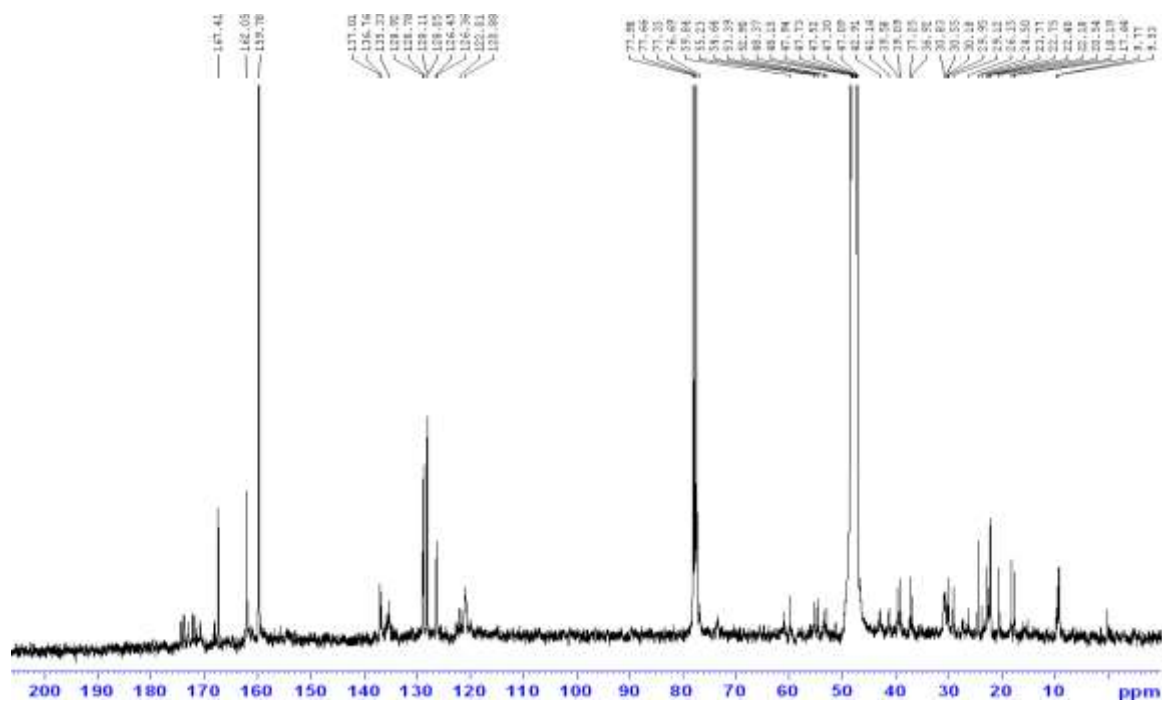

**Figure S7.** <sup>13</sup>C-NMR spectrum of conjugate **5** (100.61 MHz, MeOD/CDCl<sub>3</sub> 3:1 v/v, 297 K).

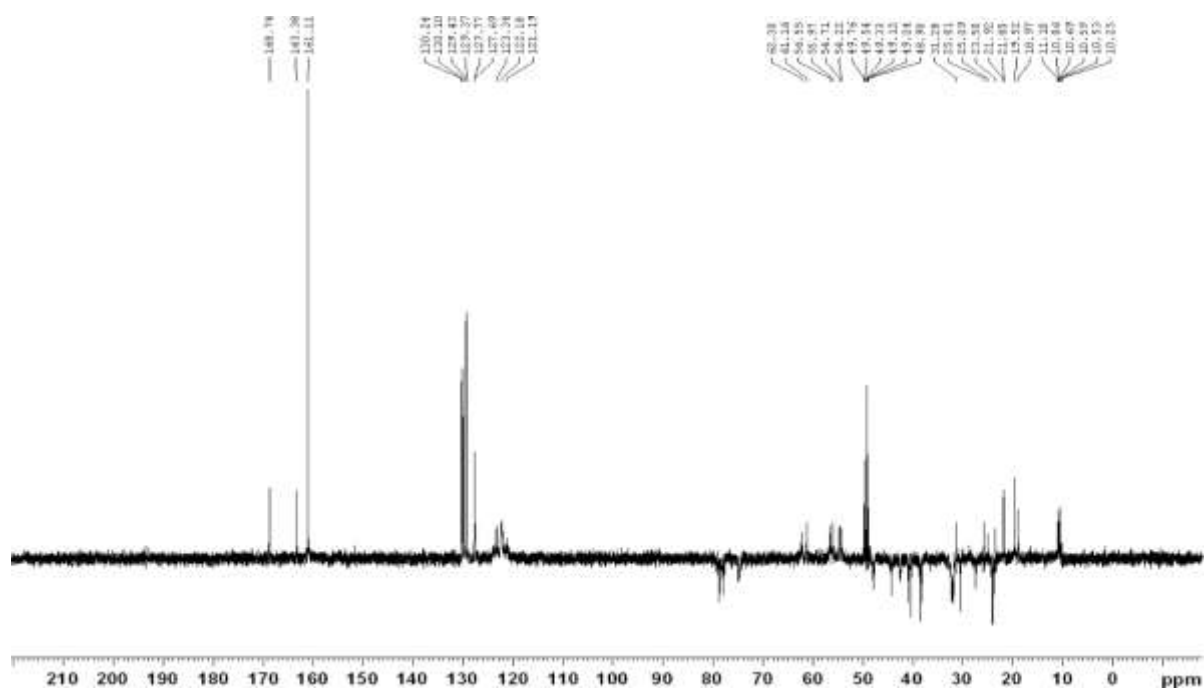

**Figure S8.**  $^{13}\text{C}$ -DEPT NMR spectrum of conjugate **5** (100.61 MHz, MeOD/ $\text{CDCl}_3$  3:1 v/v, 297 K)

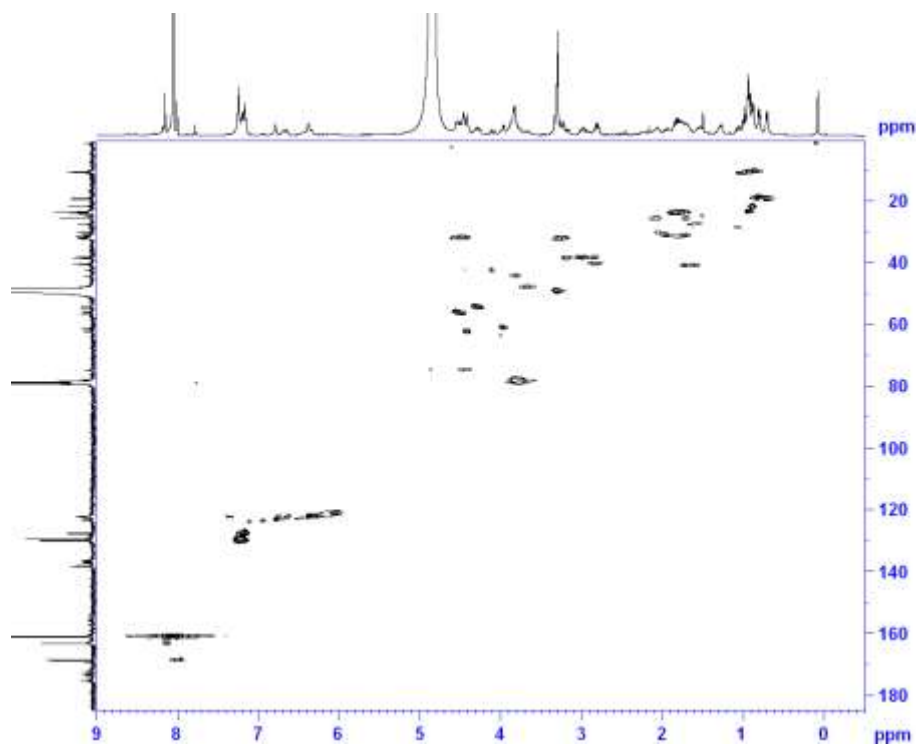

**Figure S9.** 2D-HSQC NMR spectrum of conjugate **5** (MeOD/ $\text{CDCl}_3$  3:1 v/v, 297 K)

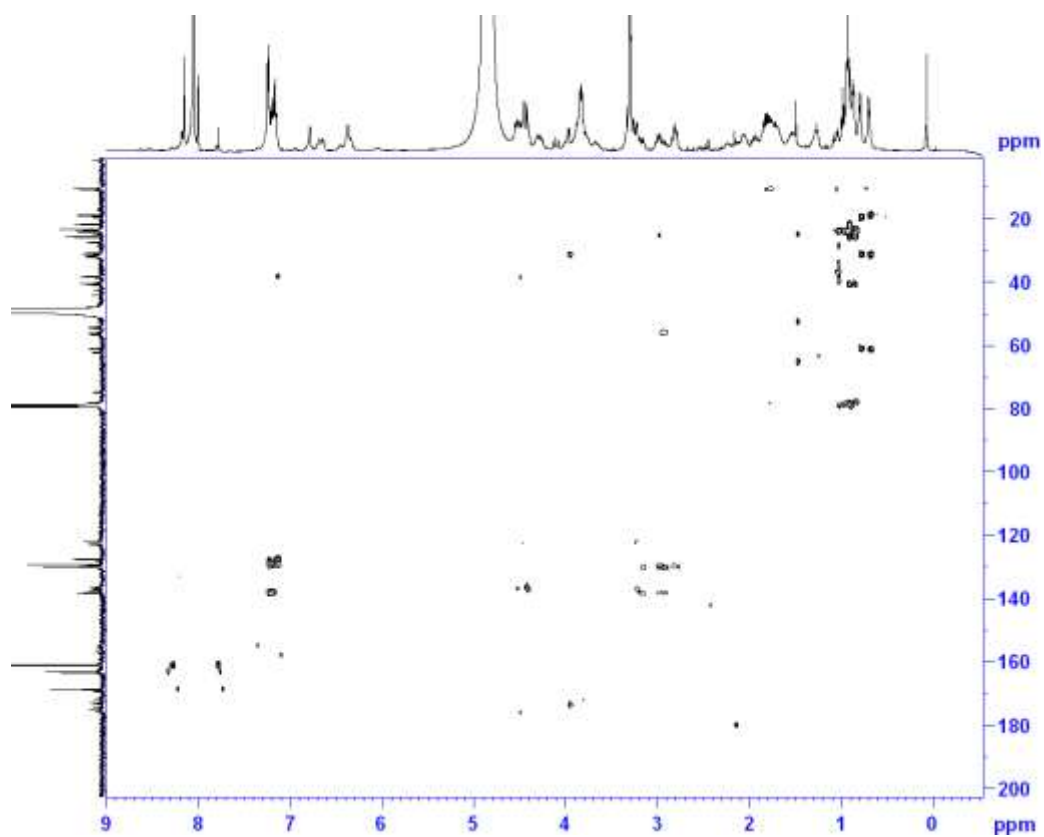

**Figure S10.** 2D-HMBC NMR spectrum of conjugate **5** (MeOD/CDCl<sub>3</sub> 3:1 v/v, 297 K)

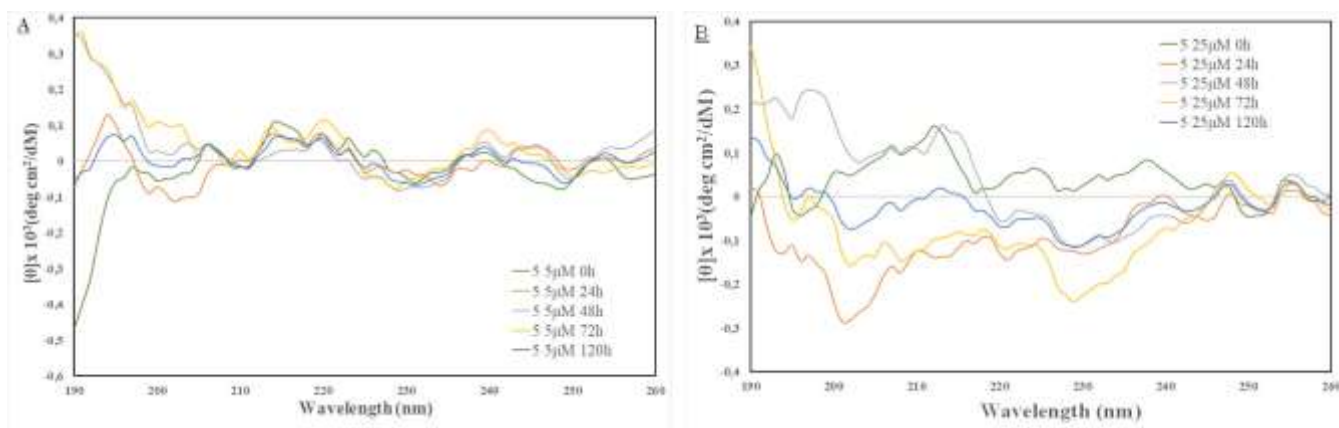

**Figure S11.** CD spectra of **5** (a) 5 $\mu$ M and (b) 25 $\mu$ M.

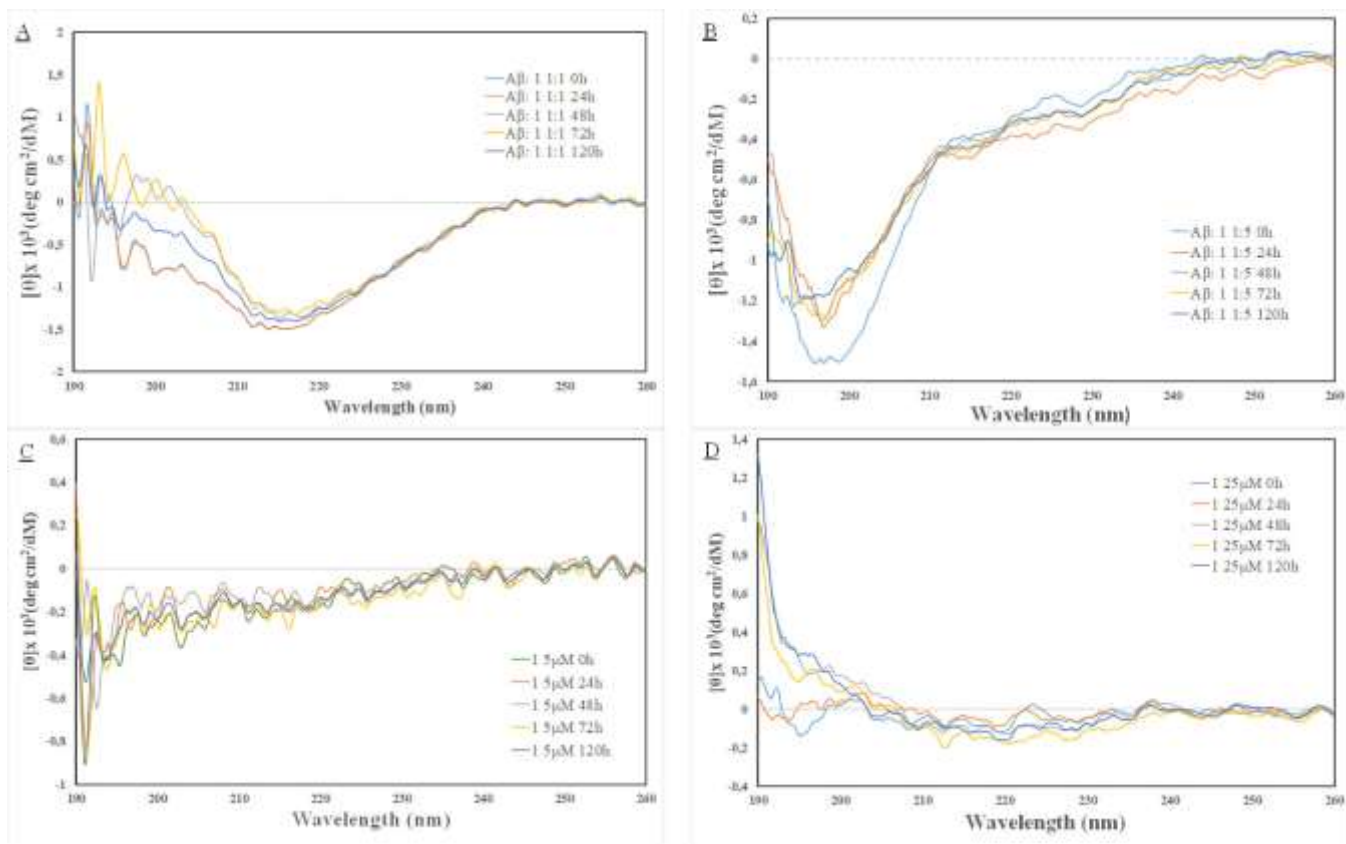

**Figure S12.** CD spectra of (a) Aβ<sub>42</sub>/1 (1:1 molar ratio); (b) Aβ<sub>42</sub>/1 (1:5 molar ratio); (c) **1** (5 μM); (d) **1** (25 μM).

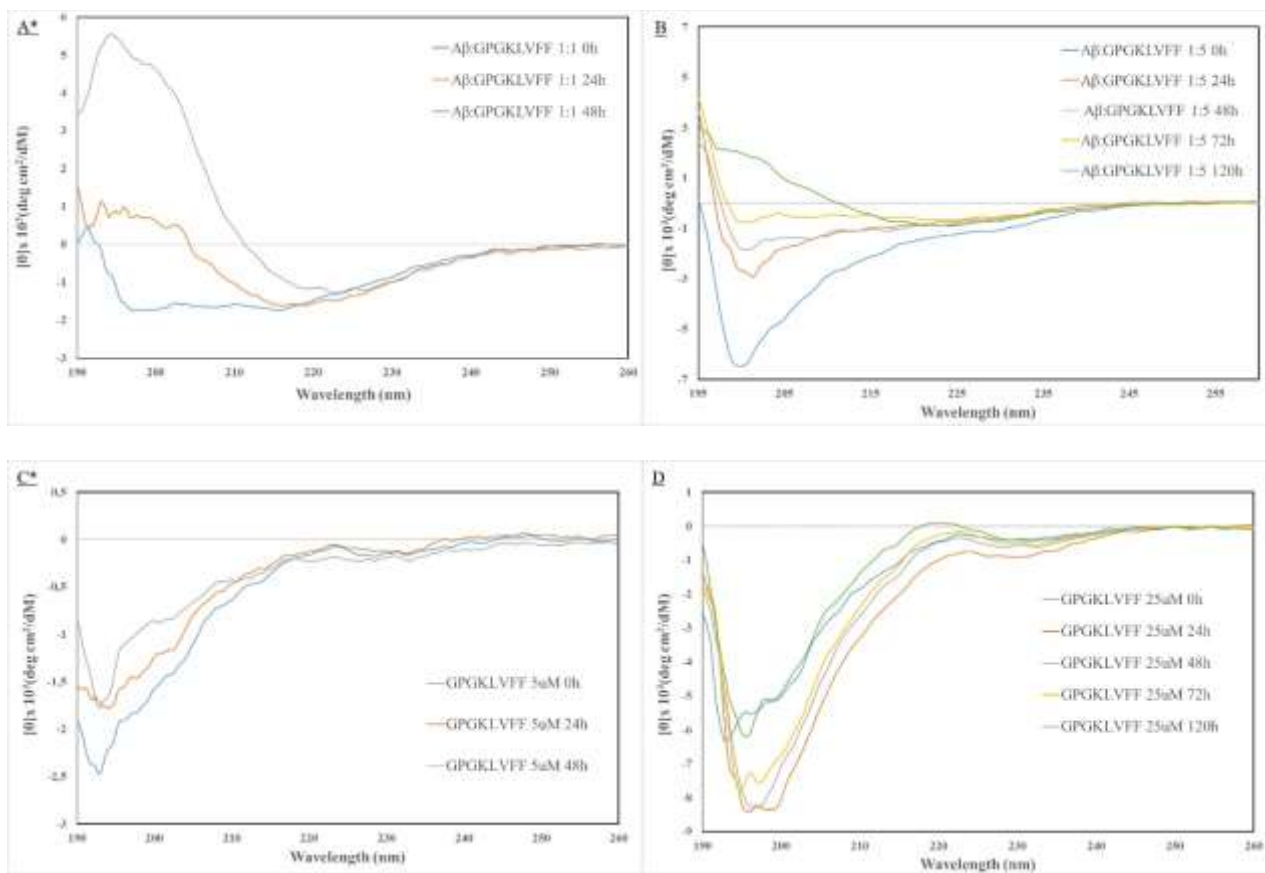

**Figure S13.** CD spectra of (a) Aβ<sub>42</sub>/GPGKLVFF (1:1 molar ratio); (b) Aβ<sub>42</sub>/GPGKLVFF (1:5 molar ratio); (c) GPGKLVFF (5 μM); (d) GPGKLVFF (25 μM). \*Monitoring at 48h because of massive sample flocculation.

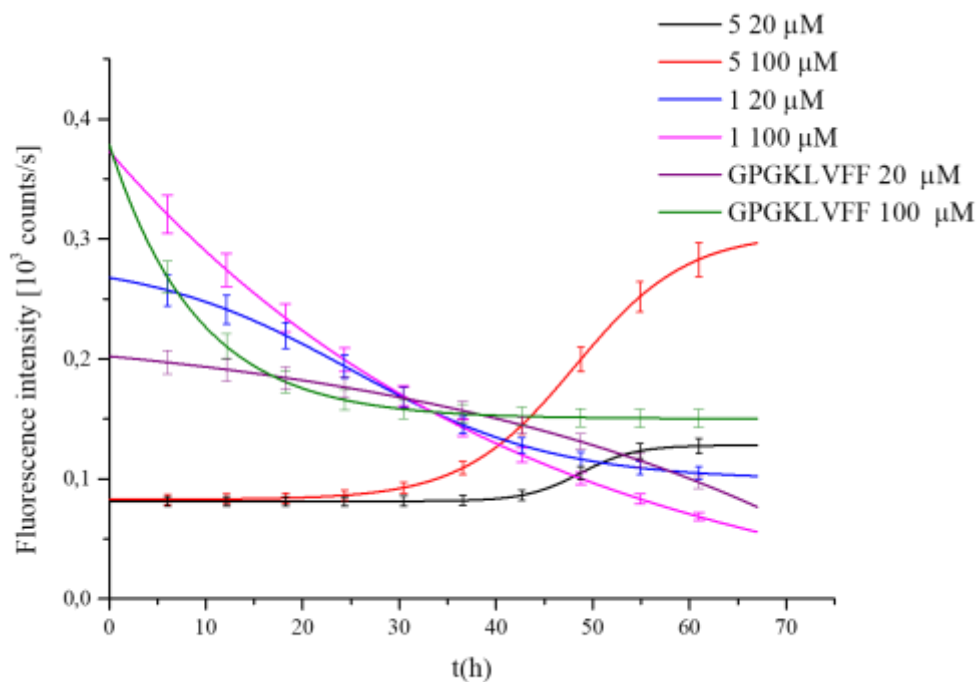

**Figure S14.** ThT fluorescence assays of **5** (20  $\mu$ M black and 100  $\mu$ M red) and of **1** (20  $\mu$ M ciano and 100  $\mu$ M pink ) and GPGKLVFF (20  $\mu$ M purple and 100  $\mu$ M green)

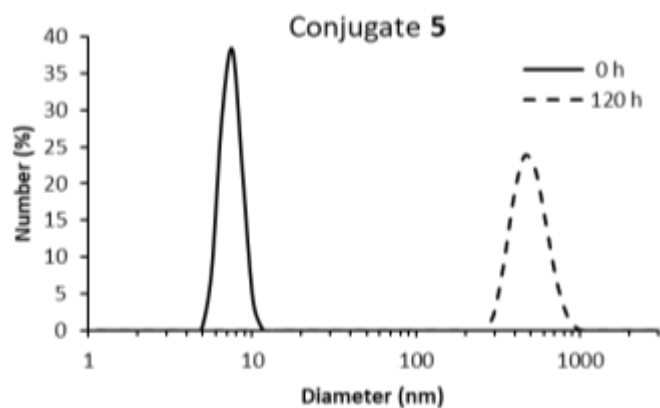

**Figure S15.** DLS size distributions by number % for conjugate **5** at  $t=0$  and after 120 h incubation at 37  $^{\circ}$ C in Phosphate buffer.



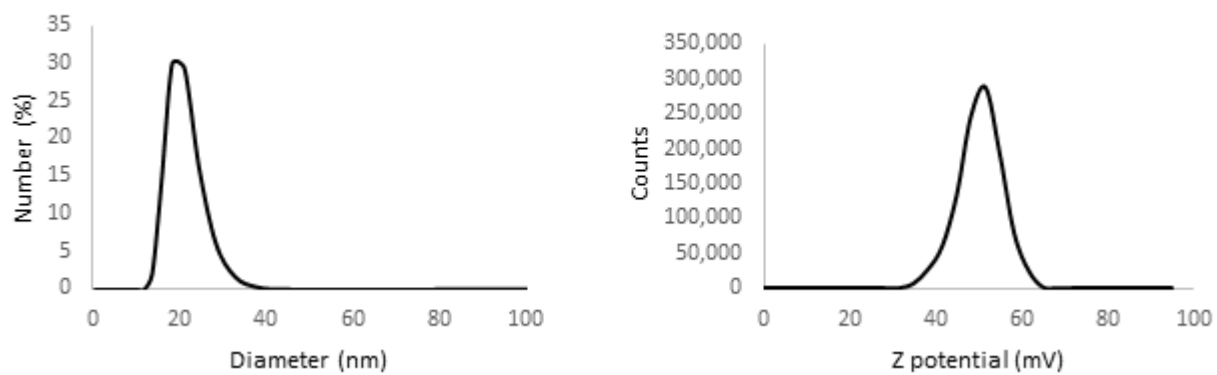

**Figure S16.** DLS size distribution by number % (left) and Electrophoretic Light Scattering (ELS) zeta potential (right) of compound **5** at 20  $\mu$ M concentration.

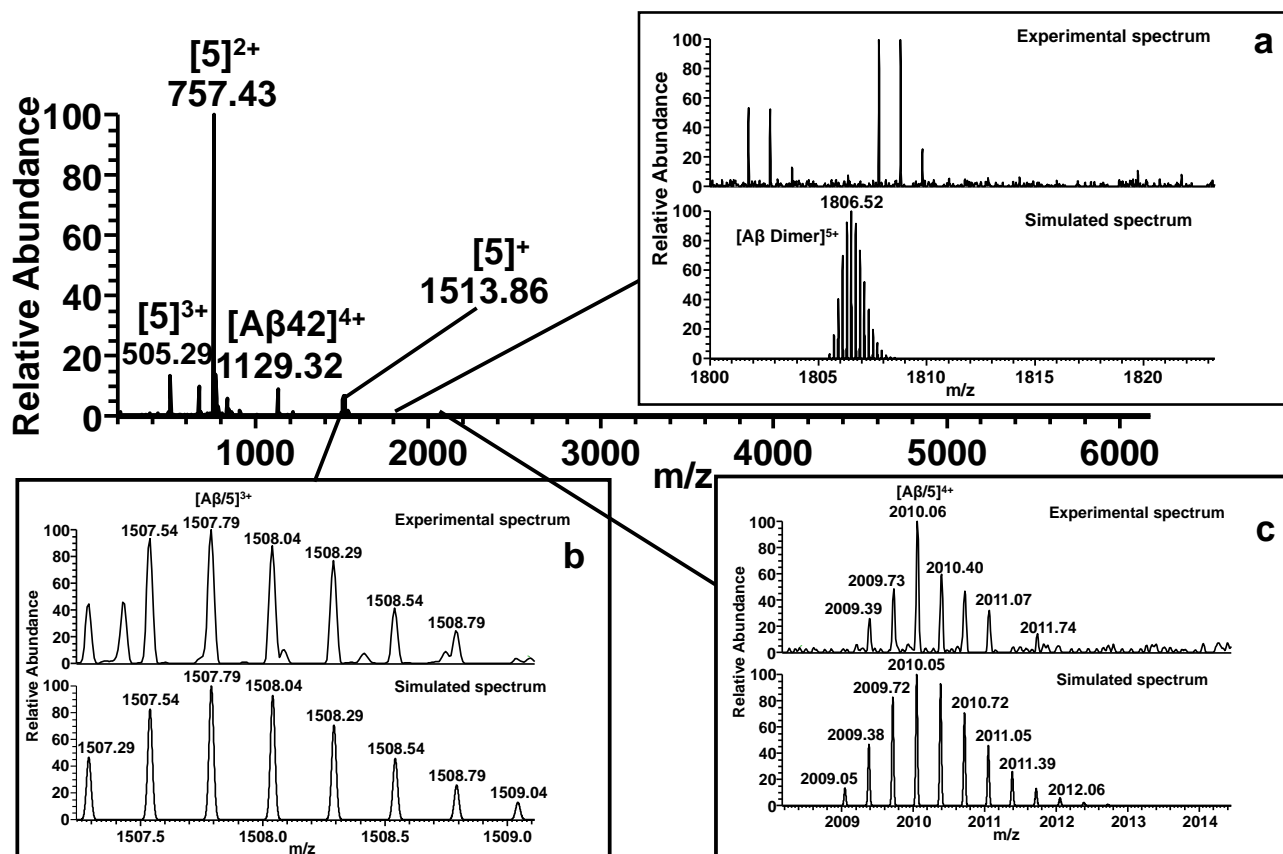

**Figure S17.** ESI-MS spectrum of Aβ<sub>42</sub>/5 sample. **Panel a** shows the comparison between the experimental and theoretical isotopic distribution of peak corresponding to the Aβ<sub>42</sub> dimer in the +5 charge state. **Panel b** and **c** show the comparison between the experimental and theoretical isotopic distribution of peaks corresponding to the Aβ<sub>42</sub>/5 adduct in the +3 and +4 charges state, respectively.

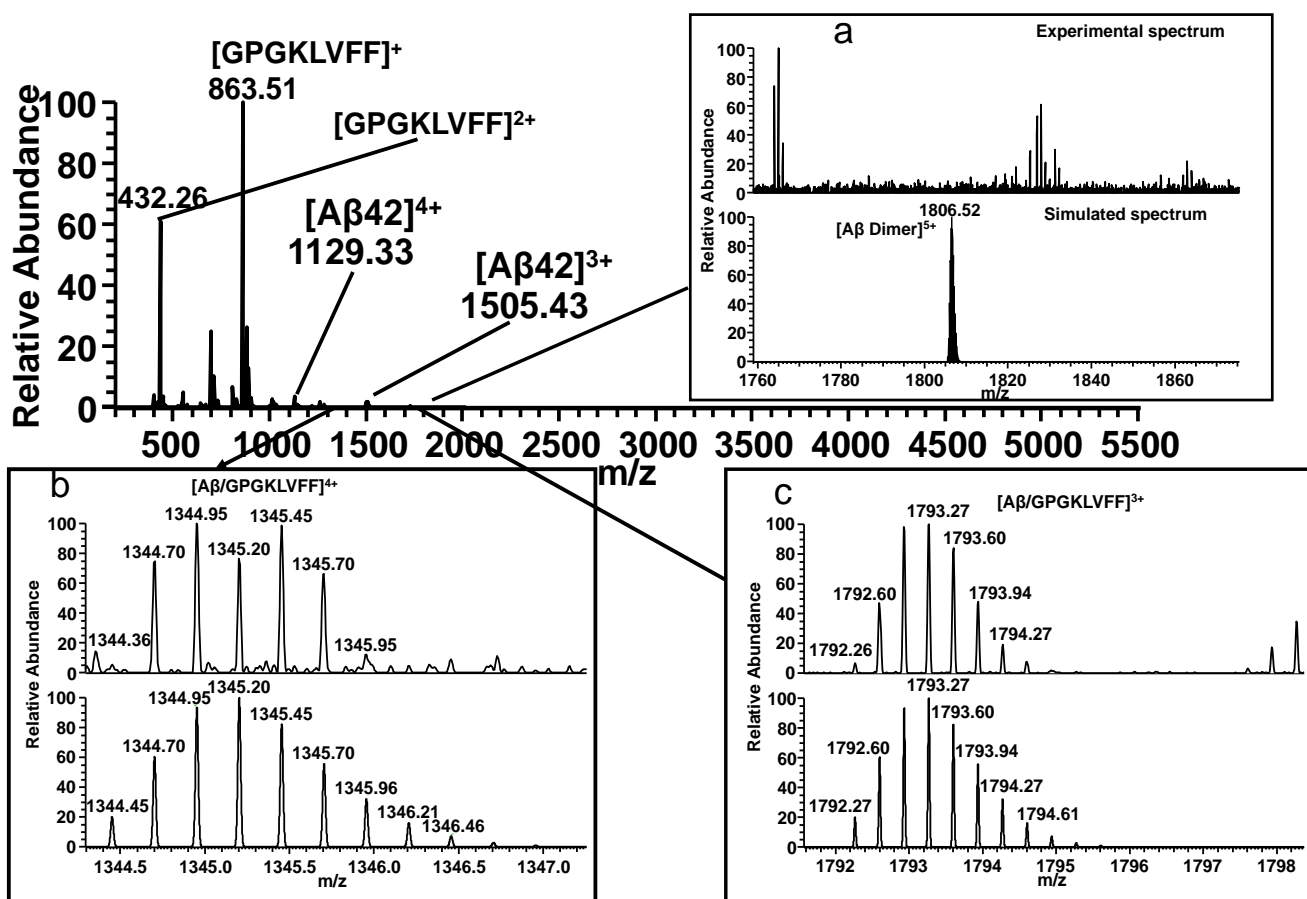

**Figure S18.** ESI-MS spectrum of Aβ<sub>42</sub>/GPGKLVFF sample. **Panel a** shows the comparison between the experimental and theoretical isotopic distribution of peak corresponding to the Aβ<sub>42</sub> dimer in the +5 charge state. **Panel b and c** show the comparison between the experimental and theoretical isotopic distribution of peak corresponding to the Aβ<sub>42</sub>/GPGKLVFF adduct in the +3 and +4 charges state, respectively.

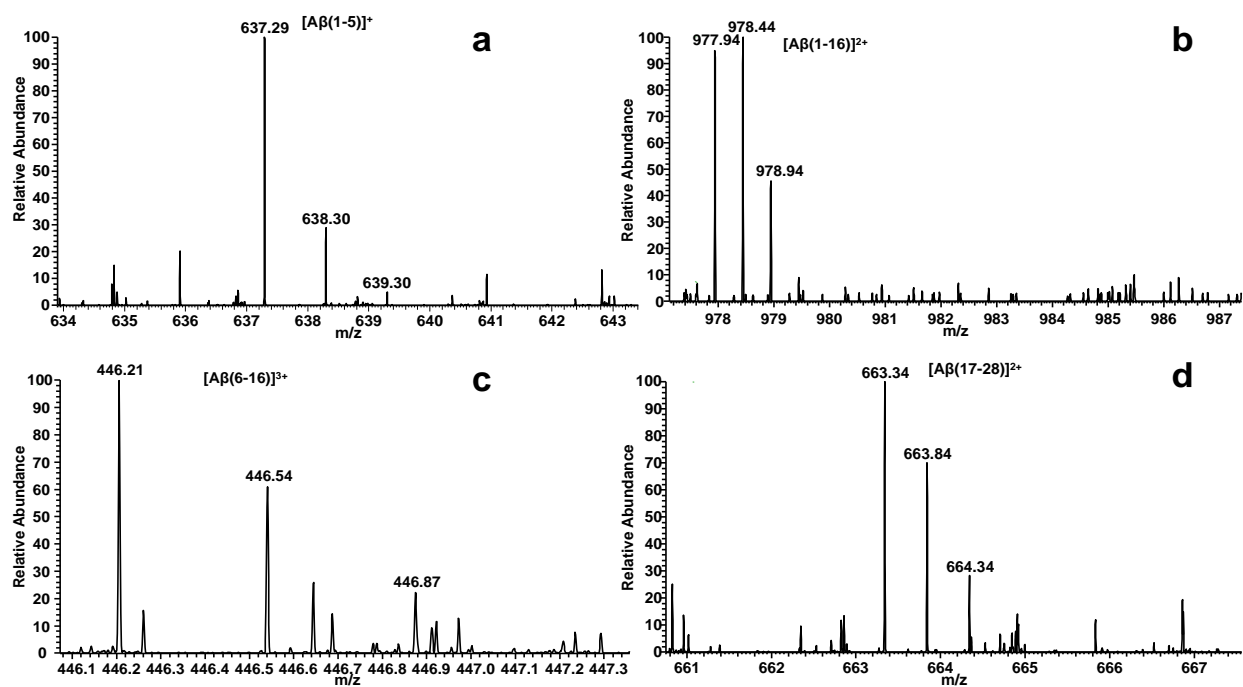

**Figure S19.** Isotopic patterns of peptide fragment produced after 2 h of A $\beta$ <sub>42</sub> digestion with trypsin. **a)** A $\beta$ (1-5), **b)** A $\beta$ (1-16), **c)** A $\beta$ (6-16) and **d)** A $\beta$ (17-28).

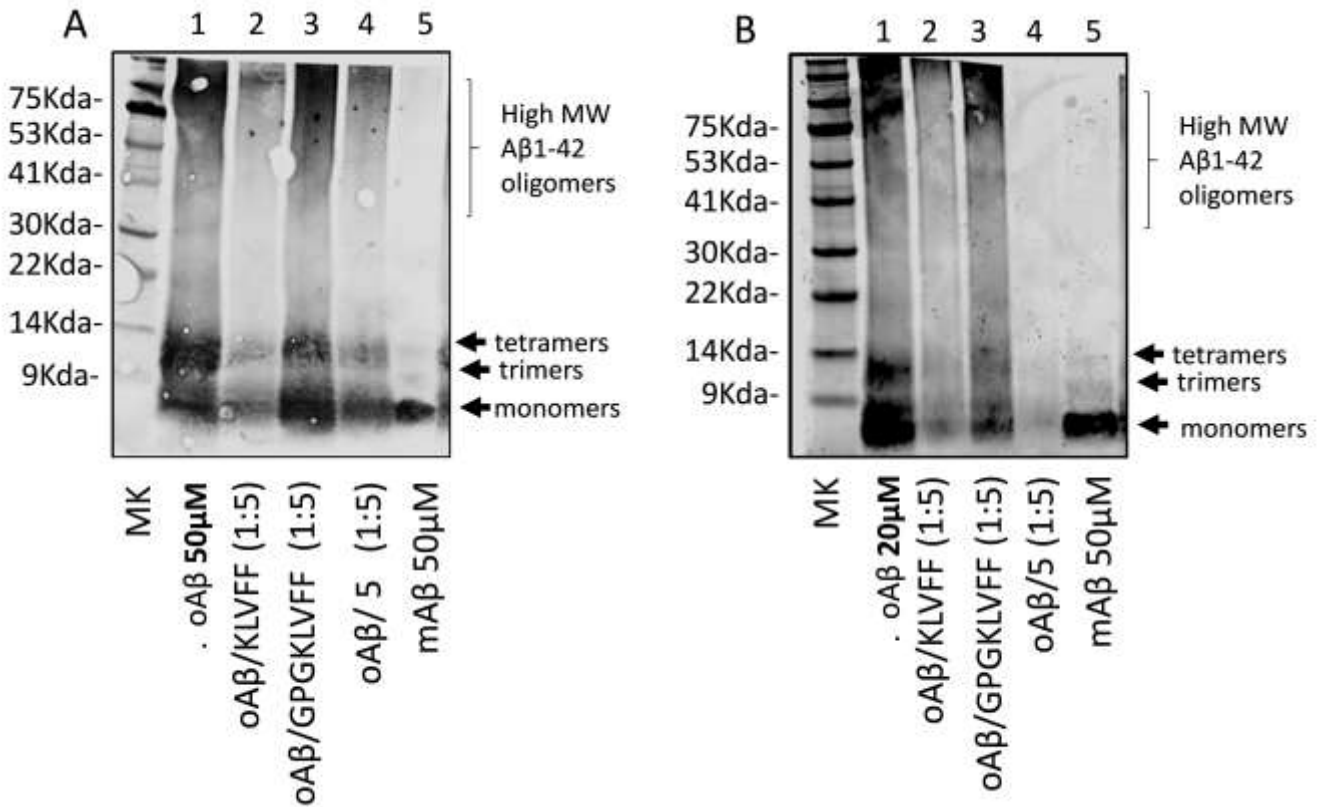

**Figure S20.** Representative western blot showing two different concentrations of Aβ oligomers obtained after 48h incubation at 4°C in the presence or absence of KLVFF peptide, GPGKLVFF and compound **5** at the Aβ/peptide ratio of 1:5. Samples were separated onto a 4–12% Bis-Tris SDS-PAGE gel and blotted with anti-Aβ N-terminal 1-16 mouse monoclonal antibody 6E10. Figures show that Aβ<sub>42</sub> gives rise to high-molecular-weight oligomeric species (lane 1), whose signal is strongly decreased when co-incubated with compound **5** (lane 4).
